# Supplementary material
Source: MDPI journal article supplement (https://www.mdpi.com/1999-4907/13/1/109)
Supplement: s1 [file s1]

**Table S1.** Tukey's test of bulk densities all machine passes of the U.S.-universal skidder Zetor 7245, F.S.1-forest skidder LKT 81 ITL, and F.S.2-forest skidder HSM 805HD. Bold type indicates statistical significance.

| Pass | US, Aproximate Likelihood of Post Hoc Tests, Error Between Groups: MS = 0.01414, DF = 44.000    |                |                |                |                |                |                |                |                |                |
|------|-------------------------------------------------------------------------------------------------|----------------|----------------|----------------|----------------|----------------|----------------|----------------|----------------|----------------|
|      | 0                                                                                               | 3              | 5              | 10             | 15             | 20             | 25             | 30             | 35             | 40             |
| 0    |                                                                                                 | -              | -              | -              | -              | -              | <b>0.01051</b> | -              | <b>0.00029</b> | <b>0.01759</b> |
| 3    | -                                                                                               |                | -              | -              | -              | -              | <b>0.02579</b> | -              | <b>0.00059</b> | <b>0.04178</b> |
| 5    | -                                                                                               | -              |                | -              | -              | -              | <b>0.01517</b> | -              | <b>0.00023</b> | <b>0.02801</b> |
| 10   | -                                                                                               | -              | -              |                | -              | -              | <b>0.00089</b> | <b>0.01008</b> | <b>0.00015</b> | <b>0.00169</b> |
| 15   | -                                                                                               | -              | -              | -              |                | -              | <b>0.00331</b> | <b>0.03507</b> | <b>0.00016</b> | <b>0.00638</b> |
| 20   | -                                                                                               | -              | -              | -              | -              |                | <b>0.00474</b> | <b>0.04806</b> | <b>0.00017</b> | <b>0.00909</b> |
| 25   | <b>0.01051</b>                                                                                  | <b>0.02579</b> | <b>0.01517</b> | <b>0.00089</b> | <b>0.00331</b> | <b>0.00474</b> |                | -              | -              | -              |
| 30   | -                                                                                               | -              | -              | <b>0.01008</b> | <b>0.03507</b> | <b>0.04806</b> | -              |                | -              | -              |
| 35   | <b>0.00029</b>                                                                                  | <b>0.00059</b> | <b>0.00023</b> | <b>0.00015</b> | <b>0.00016</b> | <b>0.00017</b> | -              | -              |                | -              |
| 40   | <b>0.01759</b>                                                                                  | <b>0.04178</b> | <b>0.02801</b> | <b>0.00169</b> | <b>0.00638</b> | <b>0.00909</b> | -              | -              | -              |                |
| Pass | F.S.1, Aproximate Likelihood of Post Hoc Tests, Error Between Groups: MS = 0.01134, DF = 50.000 |                |                |                |                |                |                |                |                |                |
|      | 0                                                                                               | 3              | 5              | 10             | 15             | 20             | 25             | 30             | 35             | 40             |
| 0    |                                                                                                 | -              | -              | <b>0.00086</b> | -              | <b>0.00875</b> | <b>0.00018</b> | <b>0.00030</b> | <b>0.00022</b> | <b>0.00023</b> |
| 3    | -                                                                                               |                | -              | -              | -              | -              | <b>0.00858</b> | <b>0.03005</b> | <b>0.01843</b> | <b>0.01960</b> |
| 5    | -                                                                                               | -              |                | -              | -              | -              | -              | -              | -              | -              |
| 10   | <b>0.00086</b>                                                                                  | -              | -              |                | -              | -              | -              | -              | -              | -              |
| 15   | -                                                                                               | -              | -              | -              |                | -              | -              | -              | -              | -              |
| 20   | <b>0.00875</b>                                                                                  | -              | -              | -              | -              |                | -              | -              | -              | -              |
| 25   | <b>0.00018</b>                                                                                  | <b>0.00858</b> | -              | -              | -              | -              |                | -              | -              | -              |
| 30   | <b>0.00030</b>                                                                                  | <b>0.03005</b> | -              | -              | -              | -              | -              |                | -              | -              |
| 35   | <b>0.00022</b>                                                                                  | <b>0.01843</b> | -              | -              | -              | -              | -              | -              |                | -              |
| 40   | <b>0.00023</b>                                                                                  | <b>0.01960</b> | -              | -              | -              | -              | -              | -              | -              |                |
| Pass | F.S.2, Aproximate likelihood of post hoc tests, Error between groups: MS = 0.00633, DF = 50.000 |                |                |                |                |                |                |                |                |                |
|      | 0                                                                                               | 3              | 5              | 10             | 15             | 20             | 25             | 30             | 35             | 40             |
| 0    |                                                                                                 | <b>0.02437</b> | <b>0.01426</b> | <b>0.00018</b> | <b>0.00015</b> | <b>0.00015</b> | <b>0.00015</b> | <b>0.00015</b> | <b>0.00015</b> | <b>0.00015</b> |
| 3    | <b>0.02437</b>                                                                                  |                | -              | -              | <b>0.01129</b> | <b>0.00354</b> | <b>0.02816</b> | -              | <b>0.00109</b> | <b>0.00985</b> |
| 5    | <b>0.01426</b>                                                                                  | -              |                | -              | <b>0.01948</b> | <b>0.00628</b> | <b>0.04670</b> | -              | <b>0.00194</b> | <b>0.01707</b> |
| 10   | <b>0.00018</b>                                                                                  | -              | -              |                | -              | -              | -              | -              | -              | -              |
| 15   | <b>0.00015</b>                                                                                  | <b>0.01129</b> | <b>0.01948</b> | -              |                | -              | -              | -              | -              | -              |
| 20   | <b>0.00015</b>                                                                                  | <b>0.00354</b> | <b>0.00628</b> | -              | -              |                | -              | -              | -              | -              |
| 25   | <b>0.00015</b>                                                                                  | <b>0.02816</b> | <b>0.04670</b> | -              | -              | -              |                | -              | -              | -              |
| 30   | <b>0.00015</b>                                                                                  | -              | -              | -              | -              | -              | -              |                | -              | -              |
| 35   | <b>0.00015</b>                                                                                  | <b>0.00109</b> | <b>0.00194</b> | -              | -              | -              | -              | -              |                | -              |
| 40   | <b>0.00015</b>                                                                                  | <b>0.00985</b> | <b>0.01707</b> | -              | -              | -              | -              | -              | -              |                |

**Table S2.** ANOVA with interactions for particular skidder types. U.S.-universal skidder Zetor 7245, F.S.1-forest skidder LKT 81 ITL, F.S.2-forest skidder HSM 805HD. Bold type indicates statistical significance.

| US                            | SS              | DF        | MS              | F               | <i>p</i>        |
|-------------------------------|-----------------|-----------|-----------------|-----------------|-----------------|
| Intercept                     | <b>7089.783</b> | <b>1</b>  | <b>7089.783</b> | <b>9288.707</b> | <b>0.000000</b> |
| Machine pass                  | <b>14.120</b>   | <b>9</b>  | <b>1.569</b>    | <b>2.055</b>    | <b>0.031306</b> |
| Depth interval                | <b>306.218</b>  | <b>3</b>  | <b>102.073</b>  | <b>133.731</b>  | <b>0.000000</b> |
| Machine pass × Depth interval | <b>88.588</b>   | <b>27</b> | <b>3.281</b>    | <b>4.299</b>    | <b>0.000000</b> |
| Error                         | 541.158         | 709       | 0.763           |                 |                 |

| F.S.1                         | SS              | DF        | MS              | F               | <i>p</i>        |
|-------------------------------|-----------------|-----------|-----------------|-----------------|-----------------|
| Intercept                     | <b>9513.703</b> | <b>1</b>  | <b>9513.703</b> | <b>10324.13</b> | <b>0.000000</b> |
| Machine pass                  | <b>49.946</b>   | <b>9</b>  | <b>5.550</b>    | <b>6.02</b>     | <b>0.000000</b> |
| Depth interval                | <b>241.754</b>  | <b>3</b>  | <b>80.585</b>   | <b>87.45</b>    | <b>0.000000</b> |
| Machine pass × Depth interval | <b>119.374</b>  | <b>27</b> | <b>4.421</b>    | <b>4.80</b>     | <b>0.000000</b> |
| Error                         | 672.696         | 730       | 0.922           |                 |                 |
| F.S.2                         | SS              | DF        | MS              | F               | <i>p</i>        |
| Intercept                     | <b>6587.997</b> | <b>1</b>  | <b>6587.997</b> | <b>4218.389</b> | <b>0.000000</b> |
| Machine pass                  | <b>87.583</b>   | <b>9</b>  | <b>9.731</b>    | <b>6.231</b>    | <b>0.000000</b> |
| Depth interval                | <b>426.708</b>  | <b>3</b>  | <b>142.236</b>  | <b>91.076</b>   | <b>0.000000</b> |
| Machine pass × Depth interval | <b>175.978</b>  | <b>27</b> | <b>6.518</b>    | <b>4.173</b>    | <b>0.000000</b> |
| Error                         | 783.990         | 502       | 1.562           |                 |                 |

× indicated interaction between groups.

**Table S3.** Tukey's test between penetration resistances of the U.S.-universal skidder Zetor 7245, F.S.1-forest skidder LKT 81 ITL, and F.S.2-forest skidder HSM 805HD. Bold type indicates statistical significance.

| US, Aproximate Likelihood of post hoc Tests, Error Between Groups: MS = 1,2621, DF = 739,00    |                |                |                |                |                |                |                |                |                |                |
|------------------------------------------------------------------------------------------------|----------------|----------------|----------------|----------------|----------------|----------------|----------------|----------------|----------------|----------------|
| Pass                                                                                           | 0              | 3              | 5              | 10             | 15             | 20             | 25             | 30             | 35             | 40             |
| 0                                                                                              |                | -              | -              | -              | -              | -              | -              | -              | -              | <b>0.00794</b> |
| 3                                                                                              | -              |                | -              | -              | -              | -              | -              | -              | -              | <b>0.00084</b> |
| 5                                                                                              | -              | -              |                | -              | -              | <b>0.01125</b> | <b>0.01033</b> | -              | -              | -              |
| 10                                                                                             | -              | -              | -              |                | -              | -              | -              | -              | -              | <b>0.01621</b> |
| 15                                                                                             | -              | -              | -              | -              |                | <b>0.04855</b> | <b>0.04567</b> | -              | -              | -              |
| 20                                                                                             | -              | -              | <b>0.01125</b> | -              | <b>0.04855</b> |                | -              | -              | -              | <b>0.00001</b> |
| 25                                                                                             | -              | -              | <b>0.01033</b> | -              | <b>0.04567</b> | -              |                | -              | -              | <b>0.00001</b> |
| 30                                                                                             | -              | -              | -              | -              | -              | -              | -              |                | -              | <b>0.00002</b> |
| 35                                                                                             | -              | -              | -              | -              | -              | -              | -              | -              |                | -              |
| 40                                                                                             | <b>0.00794</b> | <b>0.00084</b> | -              | <b>0.01621</b> | -              | <b>0.00001</b> | <b>0.00001</b> | <b>0.00002</b> | -              |                |
| F.S.1, Aproximate likelihood of post hoc tests, Error between groups: MS = 1,3607, DF = 760,00 |                |                |                |                |                |                |                |                |                |                |
| Pass                                                                                           | 0              | 3              | 5              | 10             | 15             | 20             | 25             | 30             | 35             | 40             |
| 0                                                                                              |                | -              | -              | <b>0.00510</b> | -              | -              | -              | <b>0.00166</b> | -              | -              |
| 3                                                                                              | -              |                | -              | <b>0.00081</b> | -              | -              | -              | <b>0.01242</b> | -              | -              |
| 5                                                                                              | -              | -              |                | <b>0.00324</b> | -              | -              | -              | <b>0.00482</b> | -              | -              |
| 10                                                                                             | <b>0.00510</b> | <b>0.00081</b> | <b>0.00324</b> |                | -              | -              | <b>0.00001</b> | <b>0.00001</b> | <b>0.00001</b> | <b>0.00001</b> |
| 15                                                                                             | -              | -              | -              | -              |                | -              | <b>0.00296</b> | <b>0.00001</b> | <b>0.00014</b> | <b>0.03524</b> |
| 20                                                                                             | -              | -              | -              | -              | -              |                | <b>0.00076</b> | <b>0.00001</b> | <b>0.00004</b> | <b>0.00980</b> |
| 25                                                                                             | -              | -              | -              | <b>0.00001</b> | <b>0.00296</b> | <b>0.00076</b> |                | -              | -              | -              |
| 30                                                                                             | <b>0.00166</b> | <b>0.01242</b> | <b>0.00482</b> | <b>0.00001</b> | <b>0.00001</b> | <b>0.00001</b> | -              |                | -              | -              |
| 35                                                                                             | -              | -              | -              | <b>0.00001</b> | <b>0.00014</b> | <b>0.00004</b> | -              | -              |                | -              |
| 40                                                                                             | -              | -              | -              | <b>0.00001</b> | <b>0.03524</b> | <b>0.00980</b> | -              | -              | -              |                |
| F.S.2, Aproximate likelihood of post hoc tests, Error between groups: MS = 2,8992, DF = 532,00 |                |                |                |                |                |                |                |                |                |                |
| Pass                                                                                           | 0              | 3              | 5              | 10             | 15             | 20             | 25             | 30             | 35             | 40             |
| 0                                                                                              |                | <b>0.00635</b> | <b>0.00391</b> | <b>0.00001</b> | <b>0.03961</b> | -              | -              | -              | -              | -              |
| 3                                                                                              | <b>0.00635</b> |                | -              | -              | -              | -              | -              | <b>0.00099</b> | -              | <b>0.01340</b> |
| 5                                                                                              | <b>0.00391</b> | -              |                | -              | -              | -              | -              | <b>0.00058</b> | -              | <b>0.01051</b> |
| 10                                                                                             | <b>0.00001</b> | -              | -              |                | -              | <b>0.00029</b> | -              | <b>0.00001</b> | -              | <b>0.00002</b> |
| 15                                                                                             | <b>0.03961</b> | -              | -              | -              |                | -              | -              | <b>0.00644</b> | -              | -              |
| 20                                                                                             | -              | -              | -              | <b>0.00029</b> | -              |                | -              | -              | -              | -              |

|    |   |         |         |         |         |   |   |   |   |
|----|---|---------|---------|---------|---------|---|---|---|---|
| 25 | - | -       | -       | -       | -       | - | - | - | - |
| 30 | - | 0.00099 | 0.00058 | 0.00001 | 0.00644 | - | - | - | - |
| 35 | - | -       | -       | -       | -       | - | - | - | - |
| 40 | - | 0.01340 | 0.01051 | 0.00002 | -       | - | - | - | - |
